# Supplementary material
Source: MDPI journal article supplement (https://www.mdpi.com/1996-1073/13/6/1485)
Supplement: s1 [file s1]

## Sheet: Formula
															Symbol	Definition	Unit	Unit
															Q	Work	Joules	J
															m	mass	Kilograms	kg
															C	Specific heat capacity	Joules per kilogram per kelvin	J / kg / K
															T	Tempereature	Kelvin	K
															E	Energy	Kilo watt hours	kWh
															P	Power	Watts	W
															SI	Solar Irradience	Watts per meter squared	W / m^2
															A	Area	meters squared	m^2
															t	Time	minutes	min
															L	Length	meters	m
															W	Width	meters	m

## Sheet: Variable Entry
	Variable	Value	Notes
	Mass of biomass (kg)	0	Enter the mass of biomass that is to be processed. (Or if unknown enter the biomass ratio in mixture)			Cp Values
	Mass of biomass in mixture (kg)	0	If it is only steam being produced, then 0 is entered. If HTC or pyrolysis then enter cell C3.
	Water to biomass ratio (1:x)	0	For HTC this will be approx 1:10. For pyrolysis a value of 0 should be entered.			Material	Cp (J/kg/K)
	Mass of water (kg)	0				Water	4186
	Mass of water vapourized (kg)	0	If this is a steam treatment, then C7 = C6. For HTC and pyrolysis, a value of 0 should be entered.			Example bio	2000
	Volume fraction biomass	0
	Volume fraction water	0
	Cp of biomass (J/kg/K)	0	Enter from adjacent table if biomass is within the mixture.			Key
	Cp of water (J/kg/K)	0	Enter from adjacent table if water is within the mixture.				Enter a value
	Cp mixture	#DIV/0!					Enter from 'Entahlpy Value'
	Additional 'heat of' value (J/kg)		Enter the correct value from Enthalpy value sheet.				Do not touch
	Temperature Start (K)	0	T1				Do not touch / key result
	Temperature End (K)	0	T2
	∆T (K)	0
	Time (mins)	0	Time to reach T2
	SI (W/m^2)	0	Solar Irradience
	Efficiency (%)	0	Literature reports this to be between 20 - 25%
	Width (m)	0	Width of trough
	Length (m)	0	Length of trough

## Sheet: Enthalpy Value
			Mass (Kg)	△H (J/Kg)	Total (J)
		Heat of vapourization	0	2256000	0
		Heat of HTC	0	-2400000	0
		Heat of pyrolysis	0	3000000	0

## Sheet: Results (find A & L)
	Mass of biomass in mixture (kg)	0
	Mass of Water in mixture (kg)	0				Q (J)	#DIV/0!
	Cp mixture (J /kg / K)	#DIV/0!				E (kWh)	#DIV/0!
	∆T (K)	0				P (W)	#DIV/0!
	t (min)	0				A 100 (m^2)	#DIV/0!
	SI (W/m^2)	0				A eff (m^2)	#DIV/0!		Estimated area
	Efficiency (%)	0				L (m)	#DIV/0!		Estimated length

## Sheet: Results (find t)
	Mass of biomass in mixture (kg)	0
	Mass of Water in mixture (kg)	0				Q (J)	#DIV/0!
	Cp mixture (J /kg / K)	#DIV/0!				A eff (m^2)	0
	∆T (K)	0				A 100 (m^2)	0
	SI (W/m^2)	0				t (min)	#DIV/0!	Time to reach T2
	Efficiency (%)	0				E (kWh)	#DIV/0!
	Length (m)	0				P (W)	#DIV/0!
	Width (m)	0

## Sheet: Results (find amount of bio)
	∆T (K)	0			A eff (m^2)	0
	t (min)	0			A 100 (m^2)	0
	SI (W/m^2)	0			P (W)	0
	Efficiency (%)	0			E (kWh)	0
	Length (m)	0			Q (J)	0
	Width (m)	0			△H (J/Kg)	3000000	Insert correct △H value
	Water to biomass ratio (1:x)	0			Ratio value	1	1 for Steam or pyrlosis // 11 for HTC
	Cp mixture	#DIV/0!			m total (kg)	#DIV/0!	Total mass of the mixture
		△H (J/Kg)
	Heat of vapourization	2256000
	Heat of HTC	-2400000
	Heat of pyrolysis	3000000
